# Supplementary material for: Diagnosis of Clostridioides difficile infection by analysis of volatile organic compounds in breath, plasma, and stool: A cross-sectional proof-of-concept study
Source: PLoS One. 2021 Aug 18;16(8):e0256259. doi: 10.1371/journal.pone.0256259 (PMC8372889; doi:10.1371/journal.pone.0256259)
Supplement: S3 Table — (CSV) [file pone.0256259.s006.csv]

Product ions	Cases	Controls	P-value
	(n=31)	(n=31)
H3O+14+ (mean (SD))	0.26 (0.16)	0.23 (0.15)	0.465
H3O+15+ (mean (SD))	0.77 (2.93)	0.28 (0.94)	0.375
H3O+16+ (mean (SD))	1.19 (2.91)	0.23 (0.92)	0.085
H3O+17+ (mean (SD))	23.75 (44.58)	26.72 (45.87)	0.799
H3O+18+ (mean (SD))	11971.49 (22409.67)	11208.53 (15772.14)	0.878
H3O+19+ (mean (SD))	524368.97 (29387.61)	521013.37 (29181.44)	0.656
H3O+20+ (mean (SD))	2193.31 (268.85)	2173.89 (213.44)	0.755
H3O+21+ (mean (SD))	5751.72 (607.11)	5607.41 (650.00)	0.374
H3O+22+ (mean (SD))	3.95 (3.21)	4.05 (4.03)	0.912
H3O+23+ (mean (SD))	7.29 (7.31)	4.94 (4.86)	0.143
H3O+24+ (mean (SD))	1.54 (2.20)	0.83 (1.67)	0.159
H3O+25+ (mean (SD))	0.55 (0.88)	0.67 (0.98)	0.611
H3O+26+ (mean (SD))	1.36 (2.12)	0.60 (1.39)	0.099
H3O+27+ (mean (SD))	0.72 (1.37)	1.22 (3.15)	0.432
H3O+28+ (mean (SD))	16.82 (11.67)	18.02 (13.44)	0.711
H3O+29+ (mean (SD))	504.25 (74.11)	592.23 (372.67)	0.21
H3O+30+ (mean (SD))	172.00 (31.94)	174.96 (34.53)	0.73
H3O+31+ (mean (SD))	421.59 (153.27)	437.30 (146.08)	0.683
H3O+32+ (mean (SD))	9600.56 (777.85)	9498.02 (650.00)	0.578
H3O+33+ (mean (SD))	1100.31 (411.01)	912.11 (291.51)	0.043
H3O+34+ (mean (SD))	61.20 (17.35)	55.39 (23.29)	0.275
H3O+35+ (mean (SD))	32.72 (82.15)	17.94 (21.27)	0.337
H3O+36+ (mean (SD))	479.32 (1229.74)	379.61 (580.48)	0.685
H3O+37+ (mean (SD))	393278.22 (14088.88)	394550.26 (13870.96)	0.724
H3O+38+ (mean (SD))	1162.58 (108.76)	1201.22 (149.18)	0.254
H3O+39+ (mean (SD))	3361.21 (315.46)	3453.30 (315.66)	0.259
H3O+40+ (mean (SD))	4.41 (4.89)	4.41 (4.60)	0.998
H3O+41+ (mean (SD))	90.43 (65.30)	98.40 (58.43)	0.617
H3O+42+ (mean (SD))	59.01 (58.40)	90.32 (103.50)	0.153
H3O+43+ (mean (SD))	2884.50 (2969.24)	4108.75 (8190.21)	0.444
H3O+44+ (mean (SD))	131.51 (103.33)	179.66 (307.53)	0.419
H3O+45+ (mean (SD))	2660.60 (1282.26)	3003.62 (2080.08)	0.443
H3O+46+ (mean (SD))	180.96 (47.77)	182.71 (54.96)	0.895
H3O+47+ (mean (SD))	2106.26 (1489.17)	8126.21 (28624.01)	0.255
H3O+48+ (mean (SD))	46.83 (32.40)	230.89 (850.60)	0.241
H3O+49+ (mean (SD))	52.64 (74.35)	52.25 (94.27)	0.986
H3O+50+ (mean (SD))	3.61 (4.48)	5.45 (6.61)	0.209
H3O+51+ (mean (SD))	408.86 (192.03)	358.68 (122.39)	0.227
H3O+52+ (mean (SD))	5.54 (6.90)	5.36 (5.03)	0.909
H3O+53+ (mean (SD))	5.92 (6.13)	5.58 (6.56)	0.835
H3O+54+ (mean (SD))	15.03 (16.08)	20.98 (18.92)	0.192
H3O+55+ (mean (SD))	82352.81 (15656.58)	84436.38 (15635.40)	0.605
H3O+56+ (mean (SD))	208.80 (66.47)	216.77 (61.57)	0.629
H3O+57+ (mean (SD))	1615.77 (353.34)	1703.20 (408.32)	0.376
H3O+58+ (mean (SD))	116.85 (82.72)	91.03 (38.71)	0.122
H3O+59+ (mean (SD))	33893.46 (49992.00)	17030.36 (13949.61)	0.076
H3O+60+ (mean (SD))	1593.22 (2667.42)	753.42 (523.82)	0.091
H3O+61+ (mean (SD))	1170.34 (758.90)	1447.83 (2543.41)	0.569
H3O+62+ (mean (SD))	42.77 (25.57)	48.63 (90.30)	0.733
H3O+63+ (mean (SD))	708.19 (368.18)	828.88 (586.18)	0.341
H3O+64+ (mean (SD))	23.27 (14.56)	53.03 (144.45)	0.266
H3O+65+ (mean (SD))	1296.14 (1050.68)	6060.40 (22416.18)	0.25
H3O+66+ (mean (SD))	28.01 (24.41)	169.68 (655.59)	0.242
H3O+67+ (mean (SD))	11.91 (7.52)	39.58 (120.48)	0.214
H3O+68+ (mean (SD))	5.42 (4.58)	3.76 (4.27)	0.148
H3O+69+ (mean (SD))	74.67 (35.73)	68.83 (32.00)	0.504
H3O+70+ (mean (SD))	8.30 (8.17)	11.12 (13.35)	0.326
H3O+71+ (mean (SD))	245.40 (89.08)	254.47 (155.26)	0.781
H3O+72+ (mean (SD))	24.27 (14.88)	24.44 (15.80)	0.965
H3O+73+ (mean (SD))	1867.71 (1034.93)	1973.44 (922.64)	0.675
H3O+74+ (mean (SD))	76.53 (43.90)	74.16 (62.93)	0.865
H3O+75+ (mean (SD))	136.41 (34.94)	140.12 (34.67)	0.678
H3O+76+ (mean (SD))	42.42 (145.21)	17.91 (19.96)	0.356
H3O+77+ (mean (SD))	4353.26 (8112.62)	1958.23 (1632.42)	0.113
H3O+78+ (mean (SD))	161.13 (299.82)	61.11 (55.54)	0.073
H3O+79+ (mean (SD))	504.04 (452.05)	704.81 (1506.54)	0.487
H3O+80+ (mean (SD))	19.46 (19.95)	36.95 (63.81)	0.157
H3O+81+ (mean (SD))	52.97 (70.75)	46.38 (30.82)	0.637
H3O+82+ (mean (SD))	5.12 (11.98)	3.60 (4.80)	0.517
H3O+83+ (mean (SD))	86.40 (50.05)	317.35 (1142.60)	0.273
H3O+84+ (mean (SD))	7.72 (8.07)	14.85 (30.66)	0.223
H3O+85+ (mean (SD))	880.29 (581.64)	864.68 (295.88)	0.895
H3O+86+ (mean (SD))	50.26 (30.88)	57.60 (25.60)	0.315
H3O+87+ (mean (SD))	138.14 (56.17)	131.69 (45.43)	0.623
H3O+88+ (mean (SD))	18.52 (9.82)	20.24 (10.92)	0.522
H3O+89+ (mean (SD))	148.92 (297.07)	141.99 (182.36)	0.913
H3O+90+ (mean (SD))	10.90 (20.64)	7.18 (7.84)	0.353
H3O+91+ (mean (SD))	519.20 (503.57)	532.37 (511.96)	0.92
H3O+92+ (mean (SD))	25.50 (24.87)	26.91 (27.17)	0.833
H3O+93+ (mean (SD))	81.43 (34.65)	416.79 (1750.55)	0.299
H3O+94+ (mean (SD))	7.37 (7.26)	20.51 (83.63)	0.395
H3O+95+ (mean (SD))	64.60 (48.86)	54.77 (24.08)	0.321
H3O+96+ (mean (SD))	5.21 (4.61)	3.23 (4.61)	0.098
H3O+97+ (mean (SD))	60.93 (32.98)	73.12 (67.62)	0.377
H3O+98+ (mean (SD))	3.68 (3.47)	6.68 (8.89)	0.089
H3O+99+ (mean (SD))	275.93 (131.46)	251.08 (69.71)	0.358
H3O+100+ (mean (SD))	23.33 (13.43)	20.65 (11.05)	0.397
H3O+101+ (mean (SD))	90.69 (24.56)	86.74 (23.45)	0.523
H3O+102+ (mean (SD))	13.33 (19.16)	18.37 (11.87)	0.22
H3O+103+ (mean (SD))	429.59 (299.44)	445.02 (171.25)	0.805
H3O+104+ (mean (SD))	24.10 (20.14)	27.62 (14.43)	0.435
H3O+105+ (mean (SD))	53.91 (30.79)	57.02 (50.56)	0.773
H3O+106+ (mean (SD))	4.45 (4.85)	5.54 (7.36)	0.501
H3O+107+ (mean (SD))	77.14 (67.87)	101.45 (192.51)	0.516
H3O+108+ (mean (SD))	6.02 (6.77)	10.17 (16.82)	0.213
H3O+109+ (mean (SD))	22.63 (13.99)	14.74 (9.98)	0.014
H3O+110+ (mean (SD))	2.46 (3.74)	2.82 (4.89)	0.747
H3O+111+ (mean (SD))	37.65 (12.38)	40.28 (21.52)	0.562
H3O+112+ (mean (SD))	4.33 (4.06)	5.06 (6.31)	0.591
H3O+113+ (mean (SD))	170.17 (94.68)	161.17 (36.83)	0.624
H3O+114+ (mean (SD))	16.98 (11.17)	18.45 (11.67)	0.617
H3O+115+ (mean (SD))	753.75 (363.93)	802.43 (287.35)	0.564
H3O+116+ (mean (SD))	67.53 (39.85)	64.05 (33.35)	0.713
H3O+117+ (mean (SD))	656.46 (2396.54)	135.36 (86.69)	0.231
H3O+118+ (mean (SD))	49.56 (168.62)	10.52 (5.73)	0.203
H3O+119+ (mean (SD))	63.20 (58.22)	54.05 (44.80)	0.493
H3O+120+ (mean (SD))	5.54 (6.80)	7.57 (7.18)	0.262
H3O+121+ (mean (SD))	30.83 (15.86)	38.46 (47.76)	0.409
H3O+122+ (mean (SD))	4.64 (4.99)	3.84 (4.92)	0.532
H3O+123+ (mean (SD))	5.43 (4.03)	6.62 (6.62)	0.402
H3O+124+ (mean (SD))	1.28 (2.24)	2.67 (8.21)	0.374
H3O+125+ (mean (SD))	23.10 (19.71)	32.68 (39.63)	0.239
H3O+126+ (mean (SD))	2.31 (3.56)	3.21 (5.96)	0.482
H3O+127+ (mean (SD))	65.64 (25.47)	52.68 (21.42)	0.035
H3O+128+ (mean (SD))	6.13 (7.00)	6.78 (5.29)	0.686
H3O+129+ (mean (SD))	53.44 (24.97)	42.13 (14.54)	0.034
H3O+130+ (mean (SD))	6.28 (6.92)	3.29 (4.01)	0.043
H3O+131+ (mean (SD))	98.90 (60.29)	109.11 (50.11)	0.474
H3O+132+ (mean (SD))	11.08 (13.82)	10.10 (6.52)	0.724
H3O+133+ (mean (SD))	17.83 (12.56)	15.60 (8.19)	0.413
H3O+134+ (mean (SD))	2.48 (3.40)	2.23 (3.20)	0.763
H3O+135+ (mean (SD))	9.35 (8.07)	7.30 (8.88)	0.349
H3O+136+ (mean (SD))	1.64 (3.20)	1.87 (3.53)	0.795
H3O+137+ (mean (SD))	55.38 (157.55)	35.89 (64.45)	0.527
H3O+138+ (mean (SD))	5.74 (14.97)	2.63 (4.40)	0.272
H3O+139+ (mean (SD))	11.78 (11.50)	15.87 (13.09)	0.201
H3O+140+ (mean (SD))	1.46 (3.36)	2.16 (3.09)	0.399
H3O+141+ (mean (SD))	16.80 (9.29)	22.69 (12.19)	0.038
H3O+142+ (mean (SD))	3.08 (4.00)	1.91 (2.75)	0.185
H3O+143+ (mean (SD))	45.69 (23.08)	42.00 (21.72)	0.523
H3O+144+ (mean (SD))	4.40 (5.16)	4.58 (5.34)	0.894
H3O+145+ (mean (SD))	8.18 (5.74)	10.56 (9.31)	0.235
H3O+146+ (mean (SD))	1.19 (3.07)	2.25 (4.19)	0.268
H3O+147+ (mean (SD))	5.98 (8.61)	5.63 (5.59)	0.852
H3O+148+ (mean (SD))	0.55 (1.48)	0.97 (2.20)	0.389
H3O+149+ (mean (SD))	7.12 (6.81)	9.27 (7.54)	0.248
H3O+150+ (mean (SD))	0.34 (1.01)	1.07 (2.38)	0.127
H3O+151+ (mean (SD))	2.29 (4.20)	2.67 (4.01)	0.719
H3O+152+ (mean (SD))	0.10 (0.37)	0.09 (0.36)	0.973
H3O+153+ (mean (SD))	4.54 (4.47)	5.97 (7.62)	0.379
H3O+154+ (mean (SD))	1.39 (3.00)	0.59 (1.79)	0.209
H3O+155+ (mean (SD))	22.47 (14.36)	22.29 (10.89)	0.957
H3O+156+ (mean (SD))	2.72 (4.19)	3.15 (5.47)	0.735
H3O+157+ (mean (SD))	14.70 (9.50)	16.20 (10.46)	0.559
H3O+158+ (mean (SD))	2.15 (3.45)	2.04 (3.11)	0.894
H3O+159+ (mean (SD))	7.15 (5.78)	8.23 (9.52)	0.595
H3O+160+ (mean (SD))	1.46 (2.97)	0.72 (1.52)	0.222
H3O+161+ (mean (SD))	5.97 (4.55)	7.35 (4.84)	0.255
H3O+162+ (mean (SD))	0.70 (1.87)	0.56 (1.37)	0.727
H3O+163+ (mean (SD))	2.93 (3.99)	3.52 (5.60)	0.639
H3O+164+ (mean (SD))	0.28 (0.85)	0.40 (0.95)	0.599
H3O+165+ (mean (SD))	2.56 (3.34)	3.05 (3.71)	0.587
H3O+166+ (mean (SD))	0.26 (0.72)	0.30 (0.90)	0.862
H3O+167+ (mean (SD))	8.54 (7.07)	7.71 (6.48)	0.635
H3O+168+ (mean (SD))	1.04 (1.91)	1.20 (3.45)	0.822
H3O+169+ (mean (SD))	92.89 (42.33)	85.28 (41.14)	0.479
H3O+170+ (mean (SD))	10.94 (7.66)	12.95 (9.47)	0.367
H3O+171+ (mean (SD))	6.76 (8.98)	7.54 (6.42)	0.697
H3O+172+ (mean (SD))	1.10 (2.06)	1.07 (2.56)	0.956
H3O+173+ (mean (SD))	3.88 (5.53)	3.83 (5.12)	0.966
H3O+174+ (mean (SD))	1.43 (2.71)	0.70 (1.84)	0.225
H3O+175+ (mean (SD))	3.23 (4.25)	2.66 (3.07)	0.548
H3O+176+ (mean (SD))	0.20 (0.84)	0.82 (1.62)	0.065
H3O+177+ (mean (SD))	1.31 (3.14)	1.68 (2.18)	0.592
H3O+178+ (mean (SD))	0.42 (1.85)	0.86 (2.00)	0.381
H3O+179+ (mean (SD))	0.82 (1.70)	1.75 (3.09)	0.154
H3O+180+ (mean (SD))	0.15 (0.80)	0.00 (0.00)	0.313
H3O+181+ (mean (SD))	1.40 (2.50)	2.32 (3.19)	0.217
H3O+182+ (mean (SD))	1.10 (2.09)	0.46 (1.66)	0.189
H3O+183+ (mean (SD))	16.88 (11.52)	15.60 (11.19)	0.663
H3O+184+ (mean (SD))	1.63 (2.72)	2.05 (2.69)	0.543
H3O+185+ (mean (SD))	5.22 (5.53)	4.97 (5.14)	0.855
H3O+186+ (mean (SD))	1.13 (3.27)	0.88 (2.13)	0.734
H3O+187+ (mean (SD))	1.31 (2.34)	1.78 (3.33)	0.526
H3O+188+ (mean (SD))	0.31 (0.92)	0.07 (0.39)	0.184
H3O+189+ (mean (SD))	0.90 (1.61)	1.89 (3.30)	0.146
H3O+190+ (mean (SD))	0.63 (1.94)	0.35 (1.70)	0.553
H3O+191+ (mean (SD))	18.00 (20.53)	19.73 (13.39)	0.697
H3O+192+ (mean (SD))	3.19 (6.19)	3.34 (3.84)	0.911
H3O+193+ (mean (SD))	1.23 (2.17)	0.92 (2.21)	0.578
H3O+194+ (mean (SD))	0.10 (0.54)	0.08 (0.47)	0.919
H3O+195+ (mean (SD))	1.28 (2.33)	1.32 (2.63)	0.948
H3O+196+ (mean (SD))	0.19 (0.81)	0.39 (1.34)	0.48
H3O+197+ (mean (SD))	11.40 (8.92)	10.25 (10.85)	0.653
H3O+198+ (mean (SD))	2.32 (3.63)	1.28 (1.98)	0.168
H3O+199+ (mean (SD))	3.59 (3.59)	3.29 (4.16)	0.765
H3O+200+ (mean (SD))	0.58 (1.22)	0.57 (1.76)	0.979
NO+14+ (mean (SD))	0.22 (0.26)	0.31 (0.38)	0.29
NO+15+ (mean (SD))	0.82 (2.71)	0.99 (3.17)	0.823
NO+16+ (mean (SD))	0.47 (1.77)	0.83 (2.28)	0.49
NO+17+ (mean (SD))	36.62 (92.52)	39.21 (58.06)	0.896
NO+18+ (mean (SD))	187.00 (434.23)	189.07 (262.64)	0.982
NO+19+ (mean (SD))	2322.54 (245.29)	2359.55 (307.66)	0.606
NO+20+ (mean (SD))	1.72 (4.59)	1.25 (5.52)	0.725
NO+21+ (mean (SD))	7.18 (11.38)	5.53 (10.45)	0.556
NO+22+ (mean (SD))	0.23 (0.89)	0.06 (0.34)	0.319
NO+23+ (mean (SD))	12.27 (11.48)	15.61 (15.24)	0.339
NO+24+ (mean (SD))	0.00 (0.00)	0.28 (0.90)	0.094
NO+25+ (mean (SD))	1.91 (7.82)	0.11 (0.63)	0.208
NO+26+ (mean (SD))	1.09 (3.00)	1.94 (5.24)	0.441
NO+27+ (mean (SD))	0.46 (1.98)	1.29 (3.84)	0.299
NO+28+ (mean (SD))	36.85 (25.66)	36.86 (23.32)	0.999
NO+29+ (mean (SD))	159.48 (43.20)	148.58 (51.42)	0.374
NO+30+ (mean (SD))	1000000.00 (0.00)	1000000.00 (0.00)	NaN
NO+31+ (mean (SD))	105.73 (38.35)	122.71 (50.29)	0.144
NO+32+ (mean (SD))	7828.79 (963.25)	7899.44 (982.53)	0.778
NO+33+ (mean (SD))	29.90 (17.29)	36.46 (21.46)	0.194
NO+34+ (mean (SD))	28.92 (18.97)	31.18 (22.62)	0.675
NO+35+ (mean (SD))	2.89 (7.95)	2.75 (3.99)	0.934
NO+36+ (mean (SD))	13.71 (34.36)	9.86 (13.40)	0.564
NO+37+ (mean (SD))	1029.20 (238.04)	1118.96 (299.79)	0.201
NO+38+ (mean (SD))	1.79 (4.65)	2.67 (5.22)	0.49
NO+39+ (mean (SD))	13.79 (16.15)	14.56 (14.22)	0.845
NO+40+ (mean (SD))	1.75 (4.71)	1.58 (3.39)	0.875
NO+41+ (mean (SD))	6.79 (8.98)	8.94 (11.88)	0.431
NO+42+ (mean (SD))	30.80 (23.25)	31.26 (22.54)	0.938
NO+43+ (mean (SD))	1741.72 (971.50)	1770.54 (966.09)	0.908
NO+44+ (mean (SD))	104.15 (53.07)	105.03 (46.63)	0.945
NO+45+ (mean (SD))	2063.54 (1861.74)	11050.39 (42970.81)	0.257
NO+46+ (mean (SD))	134.01 (84.91)	379.62 (1185.62)	0.262
NO+47+ (mean (SD))	219.86 (537.64)	336.39 (895.84)	0.542
NO+48+ (mean (SD))	56337.22 (7868.95)	57080.34 (7867.90)	0.714
NO+49+ (mean (SD))	44.57 (26.89)	51.43 (26.82)	0.322
NO+50+ (mean (SD))	118.95 (56.20)	118.90 (52.09)	0.998
NO+51+ (mean (SD))	11.12 (12.96)	6.65 (8.67)	0.117
NO+52+ (mean (SD))	1.05 (3.57)	1.24 (4.46)	0.852
NO+53+ (mean (SD))	1.69 (4.74)	0.93 (3.21)	0.465
NO+54+ (mean (SD))	44.48 (40.33)	48.47 (55.43)	0.749
NO+55+ (mean (SD))	258.62 (92.73)	275.22 (130.96)	0.571
NO+56+ (mean (SD))	89.24 (35.87)	87.53 (39.68)	0.861
NO+57+ (mean (SD))	1114.98 (713.96)	1210.27 (566.38)	0.565
NO+58+ (mean (SD))	266.94 (393.44)	145.06 (98.74)	0.1
NO+59+ (mean (SD))	6665.21 (7494.63)	9772.66 (21834.81)	0.463
NO+60+ (mean (SD))	255.91 (261.37)	358.21 (785.39)	0.5
NO+61+ (mean (SD))	66.80 (30.81)	76.33 (94.08)	0.6
NO+62+ (mean (SD))	34.73 (29.05)	29.05 (51.43)	0.599
NO+63+ (mean (SD))	502.90 (497.04)	3123.23 (12590.48)	0.259
NO+64+ (mean (SD))	13.53 (17.80)	77.52 (302.22)	0.252
NO+65+ (mean (SD))	5.54 (9.67)	97.03 (490.59)	0.311
NO+66+ (mean (SD))	115.13 (40.99)	139.20 (55.31)	0.059
NO+67+ (mean (SD))	15.66 (14.20)	13.95 (13.16)	0.626
NO+68+ (mean (SD))	49.01 (37.42)	38.98 (26.74)	0.232
NO+69+ (mean (SD))	65.71 (33.58)	72.09 (49.82)	0.562
NO+70+ (mean (SD))	309.13 (168.64)	306.44 (129.22)	0.945
NO+71+ (mean (SD))	2081.55 (2044.53)	2230.21 (2374.23)	0.794
NO+72+ (mean (SD))	128.19 (101.93)	123.96 (101.41)	0.871
NO+73+ (mean (SD))	445.45 (253.76)	518.38 (217.46)	0.232
NO+74+ (mean (SD))	106.09 (65.72)	115.11 (85.39)	0.646
NO+75+ (mean (SD))	80.88 (53.70)	77.40 (41.82)	0.778
NO+76+ (mean (SD))	39.06 (29.20)	159.17 (582.80)	0.264
NO+77+ (mean (SD))	699.58 (778.01)	1085.10 (2516.13)	0.425
NO+78+ (mean (SD))	35.25 (33.89)	49.67 (99.24)	0.453
NO+79+ (mean (SD))	12.74 (12.54)	17.27 (24.58)	0.371
NO+80+ (mean (SD))	6.51 (9.55)	8.24 (9.99)	0.49
NO+81+ (mean (SD))	17.65 (19.19)	33.30 (69.68)	0.24
NO+82+ (mean (SD))	22.56 (19.38)	20.49 (19.52)	0.678
NO+83+ (mean (SD))	59.04 (31.75)	55.15 (42.54)	0.688
NO+84+ (mean (SD))	190.02 (117.28)	187.73 (87.12)	0.931
NO+85+ (mean (SD))	147.91 (55.82)	153.07 (51.19)	0.708
NO+86+ (mean (SD))	143.86 (94.82)	148.65 (84.03)	0.835
NO+87+ (mean (SD))	262.95 (147.24)	229.58 (90.32)	0.289
NO+88+ (mean (SD))	25518.90 (46778.31)	10945.82 (9863.29)	0.095
NO+89+ (mean (SD))	1016.55 (1821.98)	454.34 (358.05)	0.097
NO+90+ (mean (SD))	183.87 (141.62)	144.86 (62.93)	0.167
NO+91+ (mean (SD))	275.77 (180.93)	467.91 (746.53)	0.176
NO+92+ (mean (SD))	60.09 (29.38)	69.62 (61.55)	0.446
NO+93+ (mean (SD))	52.68 (34.72)	55.48 (58.66)	0.822
NO+94+ (mean (SD))	73.78 (92.87)	66.73 (62.42)	0.728
NO+95+ (mean (SD))	24.95 (17.14)	27.80 (20.78)	0.562
NO+96+ (mean (SD))	21.32 (18.29)	27.40 (19.61)	0.215
NO+97+ (mean (SD))	26.28 (19.96)	25.37 (20.16)	0.86
NO+98+ (mean (SD))	90.79 (54.18)	95.42 (46.50)	0.721
NO+99+ (mean (SD))	162.54 (81.12)	156.09 (69.57)	0.74
NO+100+ (mean (SD))	93.75 (56.96)	100.83 (49.27)	0.605
NO+101+ (mean (SD))	301.60 (187.66)	319.62 (134.05)	0.667
NO+102+ (mean (SD))	265.18 (131.64)	261.12 (80.93)	0.885
NO+103+ (mean (SD))	45.47 (33.07)	57.98 (29.03)	0.121
NO+104+ (mean (SD))	99.53 (50.94)	93.30 (36.39)	0.583
NO+105+ (mean (SD))	117.64 (122.59)	190.70 (384.50)	0.325
NO+106+ (mean (SD))	74.92 (61.94)	78.47 (56.18)	0.815
NO+107+ (mean (SD))	23.56 (25.23)	25.25 (20.88)	0.775
NO+108+ (mean (SD))	27.19 (19.08)	26.64 (21.16)	0.915
NO+109+ (mean (SD))	10.85 (19.45)	35.01 (91.14)	0.161
NO+110+ (mean (SD))	21.86 (18.66)	26.78 (21.36)	0.343
NO+111+ (mean (SD))	60.71 (35.57)	49.64 (30.01)	0.193
NO+112+ (mean (SD))	68.21 (36.13)	69.16 (38.45)	0.922
NO+113+ (mean (SD))	102.12 (39.63)	106.38 (50.52)	0.716
NO+114+ (mean (SD))	2356.75 (1557.97)	2296.38 (928.65)	0.854
NO+115+ (mean (SD))	263.43 (132.26)	301.41 (108.94)	0.225
NO+116+ (mean (SD))	172.15 (76.23)	153.85 (62.32)	0.308
NO+117+ (mean (SD))	162.93 (223.67)	122.76 (170.02)	0.432
NO+118+ (mean (SD))	179.43 (394.70)	137.32 (214.85)	0.605
NO+119+ (mean (SD))	36.68 (32.76)	62.31 (135.62)	0.318
NO+120+ (mean (SD))	35.41 (22.33)	48.46 (42.97)	0.144
NO+121+ (mean (SD))	10.84 (13.89)	13.93 (15.92)	0.424
NO+122+ (mean (SD))	14.84 (11.65)	9.69 (9.48)	0.063
NO+123+ (mean (SD))	6.39 (9.30)	11.37 (18.80)	0.197
NO+124+ (mean (SD))	17.33 (17.68)	17.75 (19.21)	0.929
NO+125+ (mean (SD))	46.71 (44.38)	42.66 (45.60)	0.727
NO+126+ (mean (SD))	69.09 (39.08)	58.83 (35.48)	0.287
NO+127+ (mean (SD))	106.00 (67.48)	87.31 (44.33)	0.205
NO+128+ (mean (SD))	421.60 (273.89)	368.66 (154.39)	0.354
NO+129+ (mean (SD))	368.92 (251.29)	379.43 (169.10)	0.848
NO+130+ (mean (SD))	110.72 (37.52)	111.25 (42.78)	0.959
NO+131+ (mean (SD))	22.70 (21.58)	17.01 (13.74)	0.223
NO+132+ (mean (SD))	28.01 (23.69)	22.97 (18.01)	0.352
NO+133+ (mean (SD))	11.98 (11.49)	19.57 (17.86)	0.054
NO+134+ (mean (SD))	7.57 (11.68)	7.66 (11.04)	0.976
NO+135+ (mean (SD))	3.25 (6.71)	4.76 (8.59)	0.448
NO+136+ (mean (SD))	114.30 (323.37)	70.74 (130.27)	0.49
NO+137+ (mean (SD))	10.97 (33.14)	15.05 (28.50)	0.607
NO+138+ (mean (SD))	8.73 (9.13)	8.87 (11.25)	0.958
NO+139+ (mean (SD))	12.45 (14.46)	8.88 (11.97)	0.298
NO+140+ (mean (SD))	7.50 (12.99)	13.30 (16.59)	0.135
NO+141+ (mean (SD))	85.82 (52.16)	88.55 (72.60)	0.867
NO+142+ (mean (SD))	41.39 (24.39)	47.24 (32.97)	0.435
NO+143+ (mean (SD))	22.60 (21.13)	29.43 (32.42)	0.335
NO+144+ (mean (SD))	521.28 (257.65)	509.12 (193.76)	0.835
NO+145+ (mean (SD))	46.14 (36.27)	41.02 (27.26)	0.535
NO+146+ (mean (SD))	15.25 (16.91)	21.91 (20.16)	0.169
NO+147+ (mean (SD))	34.60 (32.48)	30.44 (26.20)	0.584
NO+148+ (mean (SD))	6.46 (11.15)	8.57 (11.69)	0.474
NO+149+ (mean (SD))	2.44 (5.12)	2.32 (4.99)	0.924
NO+150+ (mean (SD))	9.24 (14.11)	11.41 (11.32)	0.511
NO+151+ (mean (SD))	3.36 (7.52)	5.67 (8.80)	0.275
NO+152+ (mean (SD))	6.36 (10.50)	4.41 (8.35)	0.425
NO+153+ (mean (SD))	7.25 (9.17)	8.22 (12.29)	0.727
NO+154+ (mean (SD))	5.63 (6.48)	8.20 (11.01)	0.274
NO+155+ (mean (SD))	44.54 (23.82)	55.37 (35.60)	0.169
NO+156+ (mean (SD))	24.70 (15.83)	20.16 (16.61)	0.278
NO+157+ (mean (SD))	19.79 (14.65)	21.74 (16.22)	0.625
NO+158+ (mean (SD))	38.43 (26.30)	37.21 (26.86)	0.859
NO+159+ (mean (SD))	8.74 (10.08)	8.93 (12.77)	0.948
NO+160+ (mean (SD))	9.55 (9.95)	9.17 (12.02)	0.894
NO+161+ (mean (SD))	7.04 (9.24)	6.40 (7.63)	0.771
NO+162+ (mean (SD))	2.84 (4.54)	3.67 (8.06)	0.626
NO+163+ (mean (SD))	1.14 (2.85)	1.68 (4.61)	0.582
NO+164+ (mean (SD))	3.27 (5.97)	2.62 (5.49)	0.659
NO+165+ (mean (SD))	3.91 (8.98)	3.68 (9.78)	0.924
NO+166+ (mean (SD))	5.36 (9.63)	2.77 (5.80)	0.207
NO+167+ (mean (SD))	14.31 (12.54)	17.50 (15.31)	0.378
NO+168+ (mean (SD))	18.51 (20.45)	22.26 (22.25)	0.496
NO+169+ (mean (SD))	98.34 (37.29)	103.09 (53.69)	0.691
NO+170+ (mean (SD))	23.52 (16.64)	23.70 (19.96)	0.969
NO+171+ (mean (SD))	7.04 (10.57)	5.85 (8.62)	0.63
NO+172+ (mean (SD))	21.22 (19.27)	21.35 (17.90)	0.978
NO+173+ (mean (SD))	2.21 (4.06)	4.75 (6.58)	0.076
NO+174+ (mean (SD))	14.81 (18.04)	5.73 (10.36)	0.019
NO+175+ (mean (SD))	4.98 (6.51)	6.06 (10.57)	0.634
NO+176+ (mean (SD))	5.21 (10.00)	1.76 (3.96)	0.08
NO+177+ (mean (SD))	4.15 (7.26)	4.81 (11.36)	0.79
NO+178+ (mean (SD))	4.10 (8.35)	2.04 (3.49)	0.211
NO+179+ (mean (SD))	1.23 (3.26)	1.24 (4.01)	0.991
NO+180+ (mean (SD))	3.49 (4.55)	4.76 (9.67)	0.517
NO+181+ (mean (SD))	2.26 (4.30)	3.46 (7.84)	0.466
NO+182+ (mean (SD))	3.41 (6.95)	2.34 (4.65)	0.48
NO+183+ (mean (SD))	8.12 (12.63)	14.64 (15.80)	0.081
NO+184+ (mean (SD))	5.31 (9.91)	8.15 (10.06)	0.272
NO+185+ (mean (SD))	5.64 (9.01)	5.51 (8.10)	0.954
NO+186+ (mean (SD))	16.08 (14.88)	15.91 (12.21)	0.96
NO+187+ (mean (SD))	2.54 (6.81)	3.95 (9.87)	0.518
NO+188+ (mean (SD))	6.45 (8.66)	7.86 (9.18)	0.54
NO+189+ (mean (SD))	3.07 (5.02)	3.07 (4.45)	0.997
NO+190+ (mean (SD))	176.06 (172.17)	141.99 (107.01)	0.355
NO+191+ (mean (SD))	31.08 (32.14)	22.54 (25.90)	0.257
NO+192+ (mean (SD))	4.10 (7.87)	5.37 (8.72)	0.555
NO+193+ (mean (SD))	3.25 (7.69)	2.37 (5.60)	0.612
NO+194+ (mean (SD))	2.12 (6.90)	3.74 (7.58)	0.387
NO+195+ (mean (SD))	2.78 (6.43)	1.04 (2.65)	0.171
NO+196+ (mean (SD))	2.36 (5.43)	3.93 (10.88)	0.481
NO+197+ (mean (SD))	29.44 (24.72)	26.58 (19.09)	0.614
NO+198+ (mean (SD))	10.24 (13.42)	19.39 (16.98)	0.023
NO+199+ (mean (SD))	2.25 (3.69)	2.82 (5.52)	0.643
NO+200+ (mean (SD))	7.77 (13.21)	7.72 (8.74)	0.988
O2+14+ (mean (SD))	0.20 (0.24)	0.14 (0.16)	0.264
O2+15+ (mean (SD))	1.68 (4.24)	2.76 (6.57)	0.45
O2+16+ (mean (SD))	0.92 (2.99)	1.79 (3.25)	0.277
O2+17+ (mean (SD))	16896.28 (37036.14)	15106.37 (21191.89)	0.817
O2+18+ (mean (SD))	1644.37 (4353.83)	1215.76 (1454.90)	0.606
O2+19+ (mean (SD))	32530.78 (2799.49)	32917.80 (3198.47)	0.617
O2+20+ (mean (SD))	24.28 (23.81)	26.40 (20.49)	0.71
O2+21+ (mean (SD))	67.91 (28.44)	70.13 (36.04)	0.791
O2+22+ (mean (SD))	0.11 (0.59)	0.26 (0.84)	0.417
O2+23+ (mean (SD))	18.09 (16.43)	17.87 (19.41)	0.961
O2+24+ (mean (SD))	0.54 (1.93)	0.00 (0.00)	0.125
O2+25+ (mean (SD))	0.11 (0.58)	0.10 (0.57)	0.978
O2+26+ (mean (SD))	19.71 (19.02)	19.92 (21.23)	0.968
O2+27+ (mean (SD))	2.23 (4.43)	0.64 (1.98)	0.074
O2+28+ (mean (SD))	496.34 (335.55)	536.32 (340.80)	0.646
O2+29+ (mean (SD))	63.37 (35.21)	42.58 (41.66)	0.04
O2+30+ (mean (SD))	1428.89 (202.85)	1435.37 (132.49)	0.883
O2+31+ (mean (SD))	2484.15 (1134.71)	7870.94 (26219.40)	0.266
O2+32+ (mean (SD))	1000000.00 (0.00)	1000000.00 (0.00)	NaN
O2+33+ (mean (SD))	7125.65 (418.47)	7092.32 (467.96)	0.771
O2+34+ (mean (SD))	36278.89 (1314.61)	36226.68 (1007.97)	0.862
O2+35+ (mean (SD))	789.36 (2110.46)	595.30 (874.36)	0.639
O2+36+ (mean (SD))	1831.99 (411.41)	1803.35 (268.59)	0.748
O2+37+ (mean (SD))	205951.64 (22782.54)	212579.91 (22740.67)	0.26
O2+38+ (mean (SD))	353.71 (82.79)	358.90 (82.03)	0.807
O2+39+ (mean (SD))	1029.12 (188.12)	1007.94 (181.18)	0.656
O2+40+ (mean (SD))	28.54 (17.92)	28.68 (22.82)	0.979
O2+41+ (mean (SD))	82.40 (35.49)	81.41 (52.85)	0.932
O2+42+ (mean (SD))	1374.67 (1721.57)	868.41 (395.60)	0.116
O2+43+ (mean (SD))	44235.54 (68457.08)	23052.25 (16053.68)	0.099
O2+44+ (mean (SD))	1693.59 (2004.64)	1264.62 (992.18)	0.291
O2+45+ (mean (SD))	6731.13 (6227.02)	16114.56 (38318.03)	0.191
O2+46+ (mean (SD))	245.20 (154.56)	614.69 (1483.40)	0.18
O2+47+ (mean (SD))	145.46 (62.60)	642.28 (2547.27)	0.29
O2+48+ (mean (SD))	62.77 (88.83)	56.35 (115.76)	0.809
O2+49+ (mean (SD))	170.95 (111.42)	669.82 (2460.57)	0.272
O2+50+ (mean (SD))	2755.20 (270.29)	2731.47 (250.83)	0.723
O2+51+ (mean (SD))	132.91 (81.24)	153.51 (88.29)	0.347
O2+52+ (mean (SD))	29.24 (27.54)	25.55 (22.34)	0.567
O2+53+ (mean (SD))	10.77 (23.80)	18.94 (20.68)	0.158
O2+54+ (mean (SD))	78.18 (62.84)	87.39 (70.08)	0.592
O2+55+ (mean (SD))	32396.42 (6994.65)	34536.20 (7772.81)	0.263
O2+56+ (mean (SD))	988.38 (361.19)	1040.52 (382.19)	0.586
O2+57+ (mean (SD))	1323.06 (559.16)	1324.75 (370.19)	0.989
O2+58+ (mean (SD))	25365.31 (44856.21)	11255.90 (9840.27)	0.093
O2+59+ (mean (SD))	3254.16 (6241.03)	1621.75 (1199.42)	0.158
O2+60+ (mean (SD))	250.18 (273.73)	191.21 (94.57)	0.262
O2+61+ (mean (SD))	888.50 (1477.01)	520.03 (379.27)	0.184
O2+62+ (mean (SD))	101.96 (72.54)	111.77 (152.69)	0.751
O2+63+ (mean (SD))	1674.14 (1596.79)	4596.47 (11425.46)	0.171
O2+64+ (mean (SD))	63.61 (41.82)	158.46 (400.52)	0.202
O2+65+ (mean (SD))	99.32 (60.71)	652.27 (2874.24)	0.297
O2+66+ (mean (SD))	17.24 (19.05)	29.82 (65.91)	0.319
O2+67+ (mean (SD))	48.69 (50.78)	51.54 (43.17)	0.814
O2+68+ (mean (SD))	87.31 (55.34)	80.50 (63.16)	0.656
O2+69+ (mean (SD))	169.55 (64.84)	172.54 (66.00)	0.859
O2+70+ (mean (SD))	477.74 (234.60)	517.64 (199.88)	0.477
O2+71+ (mean (SD))	1079.16 (724.87)	1207.64 (694.27)	0.482
O2+72+ (mean (SD))	503.87 (392.20)	539.49 (436.92)	0.739
O2+73+ (mean (SD))	430.83 (162.66)	476.66 (122.29)	0.217
O2+74+ (mean (SD))	62.68 (34.87)	62.83 (37.17)	0.988
O2+75+ (mean (SD))	75.34 (47.48)	78.33 (38.68)	0.788
O2+76+ (mean (SD))	157.87 (92.19)	133.25 (82.70)	0.276
O2+77+ (mean (SD))	410.09 (819.94)	218.43 (151.49)	0.206
O2+78+ (mean (SD))	55.20 (27.75)	39.52 (28.90)	0.035
O2+79+ (mean (SD))	208.94 (342.46)	201.57 (214.55)	0.92
O2+80+ (mean (SD))	29.57 (24.58)	29.02 (22.67)	0.928
O2+81+ (mean (SD))	53.65 (33.33)	69.63 (76.67)	0.298
O2+82+ (mean (SD))	101.33 (57.51)	96.46 (49.05)	0.723
O2+83+ (mean (SD))	77.83 (42.97)	110.88 (140.59)	0.222
O2+84+ (mean (SD))	1723.57 (1160.70)	1736.16 (739.89)	0.96
O2+85+ (mean (SD))	236.49 (106.63)	237.93 (87.69)	0.954
O2+86+ (mean (SD))	79.19 (32.92)	66.95 (37.42)	0.181
O2+87+ (mean (SD))	298.94 (181.97)	363.42 (156.95)	0.143
O2+88+ (mean (SD))	41.12 (25.84)	47.00 (19.95)	0.323
O2+89+ (mean (SD))	40.82 (38.16)	45.64 (31.41)	0.591
O2+90+ (mean (SD))	92.02 (109.24)	72.80 (61.61)	0.399
O2+91+ (mean (SD))	59.49 (43.48)	197.55 (704.81)	0.289
O2+92+ (mean (SD))	60.44 (40.49)	60.71 (50.96)	0.982
O2+93+ (mean (SD))	94.37 (101.91)	127.07 (235.53)	0.487
O2+94+ (mean (SD))	78.48 (102.89)	65.77 (68.34)	0.571
O2+95+ (mean (SD))	52.76 (28.94)	44.28 (30.14)	0.267
O2+96+ (mean (SD))	57.35 (34.51)	66.08 (35.91)	0.337
O2+97+ (mean (SD))	64.73 (28.10)	68.67 (36.63)	0.64
O2+98+ (mean (SD))	363.06 (204.04)	349.42 (132.80)	0.757
O2+99+ (mean (SD))	102.96 (61.77)	94.67 (38.23)	0.529
O2+100+ (mean (SD))	51.50 (31.80)	43.01 (27.57)	0.269
O2+101+ (mean (SD))	43.42 (25.67)	54.44 (29.59)	0.126
O2+102+ (mean (SD))	8.45 (9.64)	14.53 (14.59)	0.061
O2+103+ (mean (SD))	43.66 (31.79)	41.22 (23.05)	0.731
O2+104+ (mean (SD))	15.07 (13.90)	14.86 (16.74)	0.958
O2+105+ (mean (SD))	38.30 (24.00)	63.30 (98.83)	0.183
O2+106+ (mean (SD))	77.66 (66.60)	112.05 (240.53)	0.453
O2+107+ (mean (SD))	32.13 (33.52)	39.86 (43.67)	0.442
O2+108+ (mean (SD))	30.01 (30.34)	25.92 (19.63)	0.533
O2+109+ (mean (SD))	13.44 (15.71)	13.65 (13.03)	0.954
O2+110+ (mean (SD))	40.33 (24.97)	31.90 (22.19)	0.168
O2+111+ (mean (SD))	50.31 (31.44)	59.80 (37.99)	0.293
O2+112+ (mean (SD))	131.16 (88.57)	128.18 (59.68)	0.878
O2+113+ (mean (SD))	84.42 (38.82)	98.03 (42.29)	0.196
O2+114+ (mean (SD))	89.19 (44.72)	91.73 (37.49)	0.81
O2+115+ (mean (SD))	106.09 (68.17)	125.02 (52.62)	0.229
O2+116+ (mean (SD))	31.52 (69.81)	20.56 (15.22)	0.397
O2+117+ (mean (SD))	46.41 (140.91)	21.09 (14.40)	0.323
O2+118+ (mean (SD))	32.84 (25.95)	34.59 (22.07)	0.776
O2+119+ (mean (SD))	131.16 (88.22)	110.49 (69.69)	0.313
O2+120+ (mean (SD))	36.64 (28.05)	40.61 (22.95)	0.547
O2+121+ (mean (SD))	38.09 (55.25)	31.96 (26.89)	0.582
O2+122+ (mean (SD))	7.12 (10.43)	5.09 (7.82)	0.392
O2+123+ (mean (SD))	4.82 (7.39)	7.66 (9.08)	0.186
O2+124+ (mean (SD))	26.60 (25.28)	21.14 (19.10)	0.345
O2+125+ (mean (SD))	13.59 (22.42)	14.19 (16.92)	0.907
O2+126+ (mean (SD))	49.47 (35.46)	53.44 (33.93)	0.656
O2+127+ (mean (SD))	34.11 (23.60)	37.13 (29.87)	0.663
O2+128+ (mean (SD))	25.04 (19.87)	24.49 (25.39)	0.926
O2+129+ (mean (SD))	24.31 (19.78)	25.98 (22.03)	0.757
O2+130+ (mean (SD))	5.77 (9.36)	4.15 (5.44)	0.411
O2+131+ (mean (SD))	6.08 (7.41)	10.62 (12.14)	0.084
O2+132+ (mean (SD))	8.18 (8.59)	7.79 (10.02)	0.872
O2+133+ (mean (SD))	16.29 (15.87)	12.27 (11.97)	0.268
O2+134+ (mean (SD))	5.80 (8.98)	6.49 (6.67)	0.736
O2+135+ (mean (SD))	2.66 (4.24)	3.77 (5.55)	0.386
O2+136+ (mean (SD))	12.30 (33.12)	8.93 (9.30)	0.587
O2+137+ (mean (SD))	6.68 (11.84)	6.86 (11.12)	0.952
O2+138+ (mean (SD))	14.33 (19.53)	13.02 (11.71)	0.751
O2+139+ (mean (SD))	3.68 (7.11)	4.43 (6.43)	0.667
O2+140+ (mean (SD))	15.34 (15.78)	14.08 (17.04)	0.766
O2+141+ (mean (SD))	14.94 (12.90)	14.11 (11.95)	0.796
O2+142+ (mean (SD))	9.05 (14.21)	8.11 (9.53)	0.762
O2+143+ (mean (SD))	4.52 (8.12)	4.12 (6.96)	0.837
O2+144+ (mean (SD))	1.41 (4.77)	3.21 (5.64)	0.184
O2+145+ (mean (SD))	0.49 (1.89)	1.44 (3.26)	0.171
O2+146+ (mean (SD))	1.57 (4.88)	2.82 (4.87)	0.318
O2+147+ (mean (SD))	4.81 (8.23)	9.13 (10.44)	0.078
O2+148+ (mean (SD))	3.38 (6.43)	2.08 (4.39)	0.358
O2+149+ (mean (SD))	4.71 (6.23)	2.52 (4.59)	0.122
O2+150+ (mean (SD))	2.11 (6.27)	2.88 (5.94)	0.626
O2+151+ (mean (SD))	0.77 (2.56)	1.87 (5.40)	0.319
O2+152+ (mean (SD))	2.56 (6.27)	2.00 (3.64)	0.669
O2+153+ (mean (SD))	2.48 (3.97)	3.32 (7.44)	0.586
O2+154+ (mean (SD))	9.47 (11.53)	4.97 (6.68)	0.066
O2+155+ (mean (SD))	9.90 (13.20)	8.85 (7.90)	0.708
O2+156+ (mean (SD))	8.70 (11.52)	5.62 (8.88)	0.246
O2+157+ (mean (SD))	1.53 (4.04)	2.40 (4.89)	0.453
O2+158+ (mean (SD))	3.68 (6.95)	3.19 (8.40)	0.806
O2+159+ (mean (SD))	2.86 (5.80)	0.93 (1.82)	0.083
O2+160+ (mean (SD))	1.14 (2.86)	2.27 (5.61)	0.329
O2+161+ (mean (SD))	7.02 (8.16)	5.60 (6.49)	0.454
O2+162+ (mean (SD))	2.86 (5.35)	1.89 (4.08)	0.429
O2+163+ (mean (SD))	0.69 (3.48)	1.77 (4.22)	0.281
O2+164+ (mean (SD))	3.75 (7.27)	1.16 (4.02)	0.088
O2+165+ (mean (SD))	2.50 (8.37)	3.16 (5.59)	0.721
O2+166+ (mean (SD))	2.20 (3.89)	1.85 (3.73)	0.723
O2+167+ (mean (SD))	10.37 (13.10)	8.46 (11.82)	0.551
O2+168+ (mean (SD))	5.90 (8.57)	8.42 (10.09)	0.299
O2+169+ (mean (SD))	9.69 (9.52)	7.51 (9.08)	0.365
O2+170+ (mean (SD))	11.65 (12.38)	9.62 (11.52)	0.511
O2+171+ (mean (SD))	4.29 (8.64)	2.45 (4.08)	0.291
O2+172+ (mean (SD))	1.66 (4.22)	1.00 (2.72)	0.469
O2+173+ (mean (SD))	0.00 (0.00)	2.59 (5.02)	0.007
O2+174+ (mean (SD))	1.48 (3.43)	2.01 (6.14)	0.683
O2+175+ (mean (SD))	144.74 (148.79)	114.43 (55.74)	0.293
O2+176+ (mean (SD))	19.80 (21.19)	16.87 (16.74)	0.551
O2+177+ (mean (SD))	5.16 (6.49)	0.84 (2.67)	0.001
O2+178+ (mean (SD))	0.75 (2.64)	2.53 (7.24)	0.21
O2+179+ (mean (SD))	2.51 (5.07)	1.29 (6.12)	0.403
O2+180+ (mean (SD))	0.71 (2.17)	3.53 (5.35)	0.009
O2+181+ (mean (SD))	2.26 (5.48)	2.80 (5.77)	0.709
O2+182+ (mean (SD))	1.86 (5.67)	5.70 (8.63)	0.045
O2+183+ (mean (SD))	4.47 (7.31)	2.92 (5.91)	0.367
O2+184+ (mean (SD))	0.73 (2.14)	3.19 (5.21)	0.02
O2+185+ (mean (SD))	2.26 (5.55)	1.20 (2.79)	0.35
O2+186+ (mean (SD))	0.81 (3.02)	0.88 (3.28)	0.931
O2+187+ (mean (SD))	2.32 (5.03)	1.74 (4.63)	0.644
O2+188+ (mean (SD))	1.68 (4.38)	1.81 (5.46)	0.922
O2+189+ (mean (SD))	36.58 (31.33)	36.02 (25.02)	0.938
O2+190+ (mean (SD))	20.91 (25.94)	26.65 (21.33)	0.348
O2+191+ (mean (SD))	10.27 (10.57)	6.81 (8.55)	0.164
O2+192+ (mean (SD))	2.44 (4.81)	2.99 (5.67)	0.69
O2+193+ (mean (SD))	1.39 (2.92)	1.25 (3.08)	0.861
O2+194+ (mean (SD))	2.90 (5.90)	4.03 (8.66)	0.557
O2+195+ (mean (SD))	1.91 (3.75)	2.62 (4.61)	0.516
O2+196+ (mean (SD))	3.45 (8.64)	3.17 (6.17)	0.887
O2+197+ (mean (SD))	4.50 (5.86)	2.87 (5.18)	0.256
O2+198+ (mean (SD))	7.47 (11.76)	9.57 (13.05)	0.511
O2+199+ (mean (SD))	1.47 (2.97)	1.46 (5.50)	0.992
O2+200+ (mean (SD))	0.89 (4.26)	0.84 (2.66)	0.958
